# Supplementary material
Source: HighWire-hosted journal article supplement (https://bmjopenquality.bmj.com/content/6/1/u211783.w5035)

Diagram 1

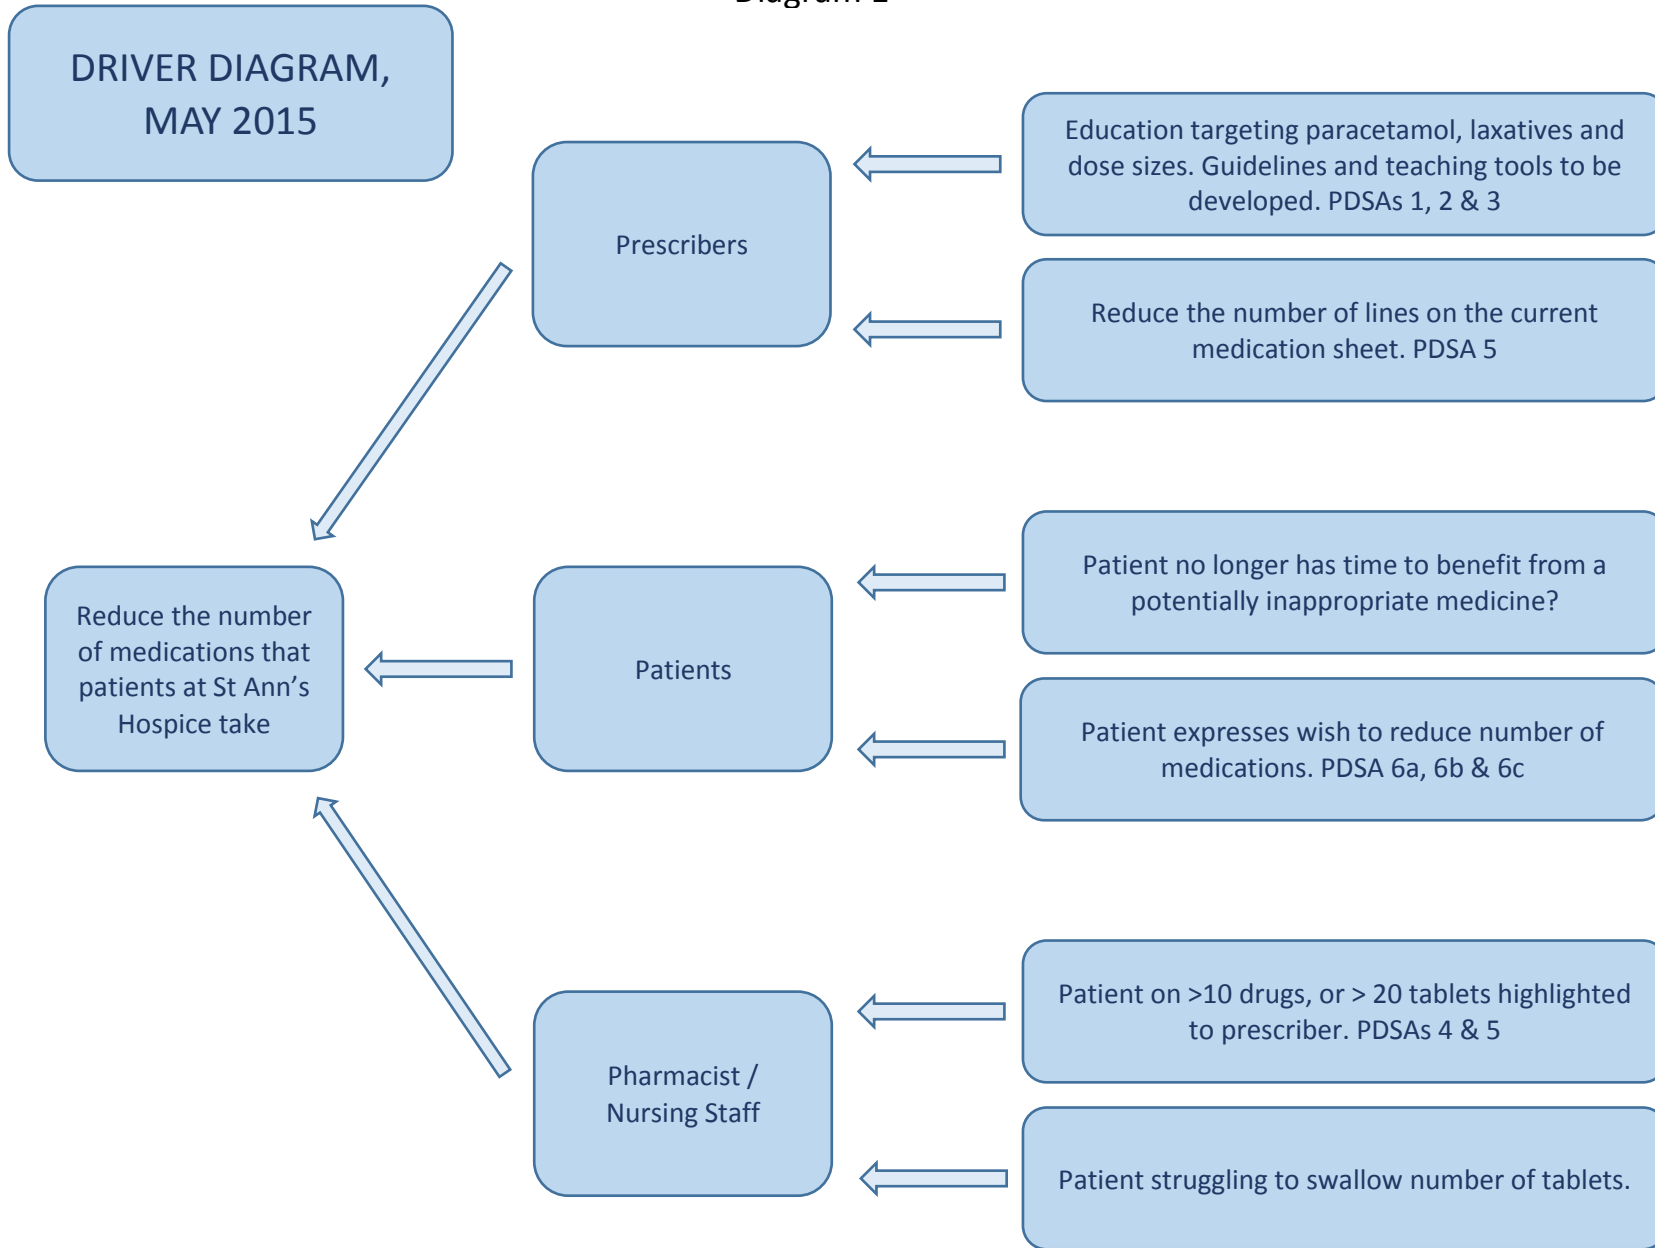

Supplement: inline-supplementary-material-1 [file inline-supplementary-material-1.pdf]
